# Supplementary material for: The iron-sulfur cluster is essential for DNA binding by human DNA polymerase ε
Source: PubMed Central journal article supplement (PMC9581978; doi:10.1038/s41598-022-21550-4), 2022-10-19
Supplement: 41598_2022_21550_MOESM1_ESM.pdf [file 41598_2022_21550_MOESM1_ESM.pdf]

## SUPPLEMENTAL INFORMATION

for the article

**The iron-sulfur cluster is essential for DNA binding by human DNA polymerase  $\epsilon$**

Alisa E. Lisova<sup>1a</sup>, Andrey G. Baranovskiy<sup>1a</sup>, Lucia M. Morstadt<sup>1</sup>, Nigar D. Babayeva<sup>1</sup>, Elena I. Stepchenkova<sup>1b</sup>, Tahir H. Tahirov<sup>1\*</sup>

Tahir H. Tahirov

Email: [ttahirov@unmc.edu](mailto:ttahirov@unmc.edu)

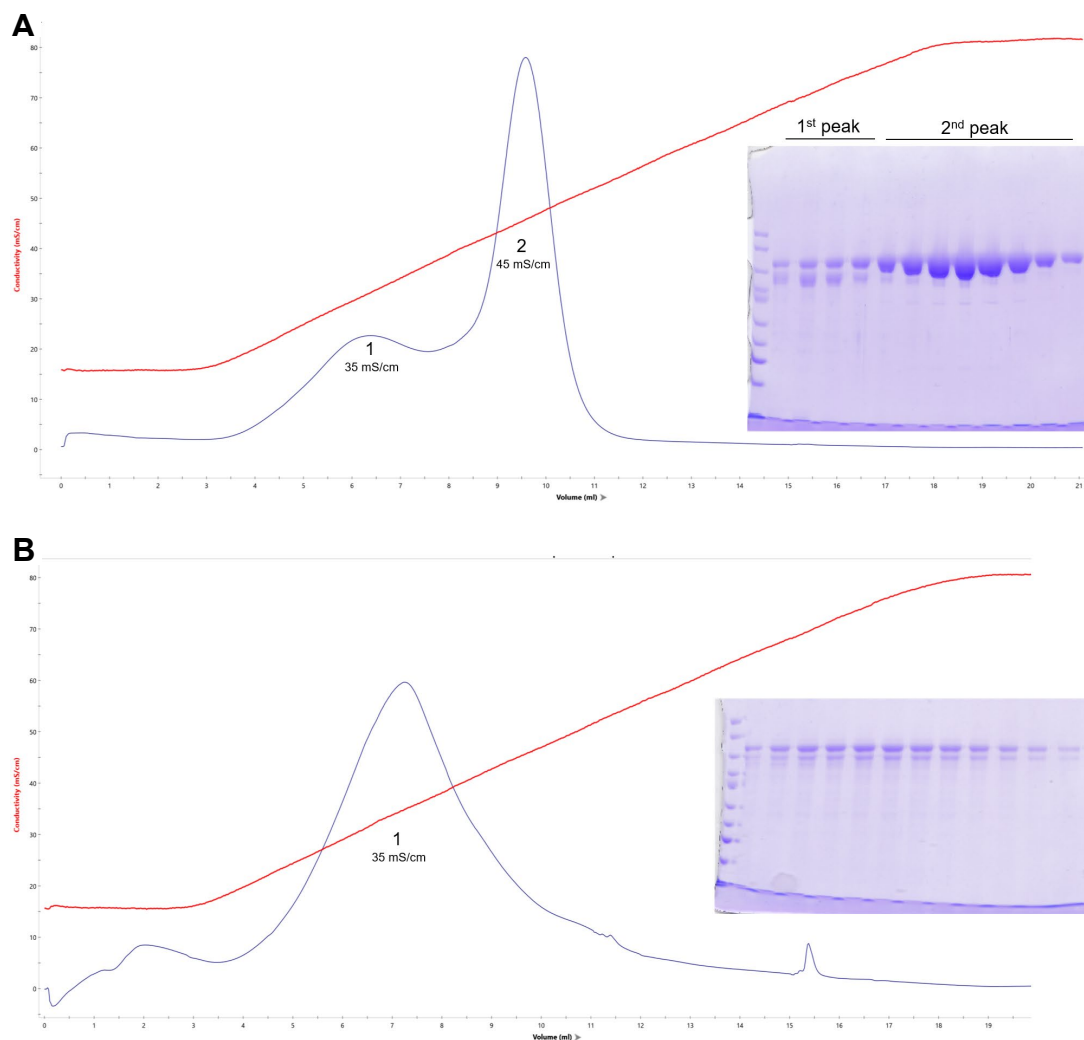

**Figure S1. Heparin elution profiles of hPol $\epsilon$ CD (A) and hPol $\epsilon$ CD<sup>M</sup> (B).** Heparin HiTrap HP column (Cytiva, 1 ml) was eluted by 15 ml gradient of 0.15 - 0.8 M NaCl. Peak fractions were analyzed by 8% SDS-PAGE and stained by Coomassie Brilliant Blue R-250. The mutant elutes as a wide peak and at lower salt concentration than wild-type hPol $\epsilon$ CD, resulting in contamination with a proteolyzed form.

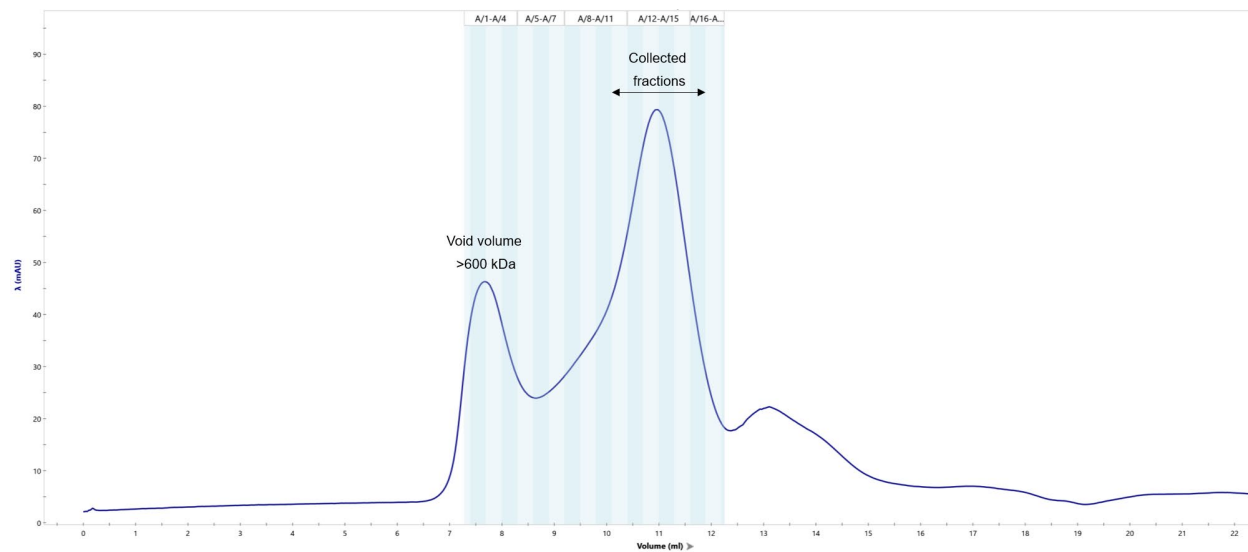

**Figure S2. Elution profile of hPolεCD<sup>M</sup> on Superose 12 size exclusion column.** Superose 12 10/300 GL (Cytiva) has a bed volume of 24 ml and an exclusion limit of 300 kDa for globular proteins. The chromatography was conducted at 4°C in the buffer containing 25 mM Tris-HEPES (pH 7.8), 0.15 M NaCl, 1% glycerol, and 2 mM TCEP.
